# Supplementary material
Source: Elsevier journal article supplement (https://www.sciencedirect.com/science/article/pii/S0211139X17301464)
Supplement: mmc1 [file S0211139X17301464:mmc1.pdf]

**Anexo 1:****Instrumento NECPAL CCOMS-ICO® (Necesidades Paliativas):** Tomado de Gomez-Batiste et al <sup>1,2</sup>

|                                                                                                                                                                                                                                                                                                                                                                                                                                                                                                                                                                                                                                                                                                                                                                                                                                                                |               |
|----------------------------------------------------------------------------------------------------------------------------------------------------------------------------------------------------------------------------------------------------------------------------------------------------------------------------------------------------------------------------------------------------------------------------------------------------------------------------------------------------------------------------------------------------------------------------------------------------------------------------------------------------------------------------------------------------------------------------------------------------------------------------------------------------------------------------------------------------------------|---------------|
| <b>BLOQUE 1. LA PREGUNTA SORPRESA</b> (una pregunta intuitiva que integra comorbilidad, aspectos sociales y otros factores)                                                                                                                                                                                                                                                                                                                                                                                                                                                                                                                                                                                                                                                                                                                                    |               |
| ¿Le sorprendería que este paciente muriese en los próximos 12 meses?                                                                                                                                                                                                                                                                                                                                                                                                                                                                                                                                                                                                                                                                                                                                                                                           | <b>Sí/ No</b> |
| <b>BLOQUE 2. ELECCIÓN / DEMANDA O NECESIDAD<sup>1</sup></b> – explore si alguna de las siguientes dos preguntas es afirmativa:<br><b>Elección / demanda:</b> ¿El paciente con enfermedad avanzada o su cuidador principal <b>han solicitado</b> , explícita o implícitamente, la realización de tratamientos paliativos / de confort de forma exclusiva, proponen limitación del esfuerzo terapéutico o rechazan tratamientos específicos o con finalidad curativa?                                                                                                                                                                                                                                                                                                                                                                                            | <b>Sí/ No</b> |
| <b>Necesidad:</b> ¿considera que este paciente <b>requiere actualmente</b> medidas paliativas o tratamientos paliativos?                                                                                                                                                                                                                                                                                                                                                                                                                                                                                                                                                                                                                                                                                                                                       | <b>Sí/ No</b> |
| <b>BLOQUE 3. INDICADORES CLÍNICOS GENERALES DE SEVERIDAD Y PROGRESIÓN</b> – explore la presencia de cualquier de los siguientes criterios de severidad y fragilidad extrema:<br><b>Marcadores nutricionales</b> , cualquiera de los siguientes, en los <b>últimos 6 meses:</b><br>Severidad: albúmina sérica < 2,5 g/dl, no relacionada con descompensación aguda.<br>Progresión: pérdida de peso > 10%.<br>Impresión clínica de deterioro nutricional o ponderal sostenido, intenso / severo, progresivo, irreversible y no relacionado con proceso intercurrente.                                                                                                                                                                                                                                                                                            | <b>Sí/ No</b> |
| <b>Marcadores funcionales</b> , cualquiera de los siguientes, en los <b>últimos 6 meses:</b><br>Severidad: dependencia funcional grave establecida (Barthel < 25, ECOG > 2 ó Karnofsky < 50%).<br>Progresión: pérdida de 2 o más ABVD (actividades básicas de la vida diaria) a pesar de intervención terapéutica adecuada.<br>Impresión clínica de deterioro funcional sostenido, intenso / severo, progresivo, irreversible y no relacionado con proceso intercurrente.                                                                                                                                                                                                                                                                                                                                                                                      | <b>Sí/ No</b> |
| <b>Otros marcadores de severidad y fragilidad extrema</b> , al menos 2 de los siguientes, en los <b>últimos 6 meses:</b><br>Úlceras por decúbito persistentes (estadio III – IV).<br>Infecciones con repercusión sistémica de repetición (> 1).<br>Síndrome confusional agudo.<br>Disfagia persistente.<br>Caídas (> 2).<br>Presencia <b>distress emocional</b> con síntomas psicológicos sostenidos, intensos/severos, progresivos y no relacionados con proceso intercurrente agudo.                                                                                                                                                                                                                                                                                                                                                                         | <b>Sí/ No</b> |
| <b>Factores adicionales de uso de recursos</b> , cualquiera de los siguientes:<br>Dos ó más ingresos urgentes (no programados) en centros hospitalarios o sociosanitarios por enfermedad crónica en el último año.<br>Necesidad de cuidados complejos / intensos continuados, bien sea en una institución o en domicilio.                                                                                                                                                                                                                                                                                                                                                                                                                                                                                                                                      | <b>Sí/ No</b> |
| <b>Comorbilidad:</b> ≥ 2 patologías concomitantes                                                                                                                                                                                                                                                                                                                                                                                                                                                                                                                                                                                                                                                                                                                                                                                                              | <b>Sí/ No</b> |
| <b>BLOQUE 4. INDICADORES CLÍNICOS ESPECÍFICOS DE SEVERIDAD Y PROGRESIÓN POR PATOLOGÍAS</b> – explore la presencia de criterios objetivos de mal pronóstico para las siguientes patologías seleccionadas:<br><b>Enfermedad oncológica</b> (sólo requiere la presencia de <b>un criterio</b> )                                                                                                                                                                                                                                                                                                                                                                                                                                                                                                                                                                   | <b>Sí/ No</b> |
| Diagnóstico confirmado de cáncer metastásico (estadio IV) y en algunos casos –como en las neoplasias de pulmón, páncreas, gástrica y esofágica– también en estadio III, que presenten: escasa respuesta o contraindicación de tratamiento específico, brote evolutivo en transcurso de tratamiento o afectación metastásica de órganos vitales (SNC, hígado, pulmonar masiva, etc.).<br>Deterioro funcional significativo (Palliative Performance Status (PPS) < 50%).<br>Síntomas persistentes mal controlados o refractarios, a pesar de optimizar tratamiento específico.                                                                                                                                                                                                                                                                                   | <b>Sí/ No</b> |
| <b>Enfermedad pulmonar crónica</b> (presencia de <b>dos o más</b> de los siguientes criterios)<br>Disnea de reposo o de mínimos esfuerzos entre exacerbaciones.<br>Síntomas físicos o psicológicos de difícil manejo, a pesar de tratamiento óptimo bien tolerado.<br>En caso de disponer de pruebas funcionales respiratorias (con advertencia sobre la calidad de las pruebas), criterios de obstrucción severa: FEV1 <30% o criterios de déficit restrictivo severo: CV forzada < 40% / DLCO < 40%.<br>En caso de disponer de gasometría arterial basal, cumplimiento de criterios de oxigenoterapia domiciliaria o estar realizando este tratamiento en casa.<br>Insuficiencia cardíaca sintomática asociada.<br>Ingresos hospitalarios recurrentes (> 3 ingresos en 12 meses por exacerbaciones de enfermedad pulmonar obstructiva crónica).              | <b>Sí/ No</b> |
| <b>Enfermedad cardíaca crónica</b> (presencia de <b>dos o más</b> de los siguientes criterios)<br>Insuficiencia cardíaca NYHA estadio III ó IV, enfermedad valvular severa o enfermedad coronaria extensa no revascularizable.<br>Disnea o angina de reposo o a mínimos esfuerzos.<br>Síntomas físicos o psicológicos de difícil manejo, a pesar de tratamiento óptimo bien tolerado.<br>En caso de disponer de ecocardiografía: fracción de eyección severamente deprimida (< 30%) o HTAP severa (PAPs > 60 mmHg).<br>Insuficiencia renal asociada (FG < 30 l/min).<br>Ingresos hospitalarios con síntomas de insuficiencia cardíaca /cardiopatía isquémica, recurrentes (> 3 último año).                                                                                                                                                                    | <b>Sí/ No</b> |
| <b>Enfermedades neurológicas crónicas (1): AVC</b> (sólo requiere la presencia de <b>un criterio</b> )<br>Durante la fase aguda y subaguda (< 3 meses post-AVC): estado vegetativo persistente o de mínima consciencia > 3 días.<br>Durante la fase crónica (> 3 meses post-AVC): complicaciones médicas repetidas (neumonía por aspiración, a pesar de medidas antidisfagia), infección urinaria de vías altas (pielonefritis) de repetición (>1), fiebre recurrente a pesar de antibióticos (fiebre persistente post > 1 semana de antibiótico), úlceras por decúbito estadio 3-4 refractarias o demencia con criterios de severidad post-AVC.                                                                                                                                                                                                               | <b>Sí/ No</b> |
| <b>Enfermedades neurológicas crónicas (2): ELA y enfermedades de motoneurona, esclerosis múltiple y parkinson</b> (presencia de <b>dos o más</b> de los siguientes criterios)<br>Deterioro progresivo de la función física y / o cognitiva, a pesar de tratamiento óptimo.<br>Síntomas complejos y difíciles de controlar.<br>Problemas en el habla / aumento de dificultad para comunicarse.<br>Disfagia progresiva.<br>Neumonía por aspiración recurrente, disnea o insuficiencia respiratoria.                                                                                                                                                                                                                                                                                                                                                              | <b>Sí/ No</b> |
| <b>Enfermedad hepática crónica grave</b> (sólo requiere la presencia de <b>un criterio</b> )<br>Cirrosis avanzada: estadio Child C (determinado en ausencia de complicaciones o habiéndolas tratado y optimizado el tratamiento), puntuación de MELD-Na > 30 o con una o más de las siguientes complicaciones médicas: ascitis refractaria, síndrome hepato-renal o hemorragia digestiva alta por hipertensión portal persistente con fracaso al tratamiento farmacológico y endoscópico y no candidato a TIPS, en pacientes no candidatos a trasplante.<br>Carcinoma hepatocelular: presente, en estadio C o D (BCLC).                                                                                                                                                                                                                                        | <b>Sí/ No</b> |
| <b>Enfermedad renal crónica grave</b> (sólo requiere la presencia de <b>un criterio</b> )<br>Insuficiencia renal grave (FG < 15) en pacientes no candidatos a tratamiento sustitutivo y / o trasplante.                                                                                                                                                                                                                                                                                                                                                                                                                                                                                                                                                                                                                                                        | <b>Sí/ No</b> |
| <b>Demencia</b> (presencia de <b>dos o más</b> de los siguientes criterios)<br>Criterios de severidad : incapacidad para vestirse, lavarse o comer sin asistencia (GDS/FAST 6c), aparición de incontinencia doble (GDS/FAST 6d-e) o incapacidad de hablar o comunicarse con sentido -6 o menos palabras inteligibles- (GDS/FAST 7).<br>Criterios de progresión: pérdida de 2 o más actividades básicas de la vida diaria en últimos 6 meses, a pesar de intervención terapéutica adecuada (no valorable en situación aguda por proceso intercurrente), disfagia, o negativa a comer, en pacientes que no recibirán nutrición enteral o parenteral.<br>Criterio de uso de recursos: múltiples ingresos (> 3 en 12 meses, por procesos intercurrentes -neumonía aspirativa, pielonefritis, septicemia, etc.- que condicionen deterioro funcional y/o cognitivo). | <b>Sí/ No</b> |

<sup>1</sup>En el contexto mediterráneo/latino, donde la autonomía del propio enfermo es menos manifiesta que en el anglosajón/norte-europeo, es frecuente que sea la familia o miembros del equipo los que pueden solicitar limitación del esfuerzo terapéutico o medidas paliativas, o ambas.

**Anexo 2:****Índice PROFUND**, tomado de Bernabeu-Wittel et al <sup>4</sup>

| <b>PARÁMETROS</b>                                       | <b>PUNTOS</b> |
|---------------------------------------------------------|---------------|
| <b>Demográficas</b>                                     |               |
| ≥ 85 años                                               | 3             |
| <b>Variables clínicas</b>                               |               |
| Neoplasia activa                                        | 6             |
| Demencia                                                | 3             |
| Clase Funcional III-IV de la NYHA * y/o MRC*            | 3             |
| Delirium en el último ingreso                           | 3             |
| <b>Parámetros analíticos (sangre-plasma)</b>            |               |
| Hemoglobina < 10 g/dL                                   | 3             |
| <b>Variables cognitivas-funcionales-sociofamiliares</b> |               |
| Índice de Barthel < 60                                  | 4             |
| Cuidador diferente al cónyuge                           | 2             |
| <b>Variable asistencial:</b>                            |               |
| ≥ 4 hospitalizaciones en los últimos 12 meses           | 3             |
| <b>Límites puntuación total</b>                         | <b>0-30</b>   |

\* NYHA : *New York Heart Association*; MRC: *Medical Research Council* .
